# Supplementary material for: Sequence Variability in Staphylococcal Enterotoxin Genes seb, sec, and sed
Source: PubMed Central journal article supplement (PMC4926136; doi:10.3390/toxins8060169), 2016-06-01
Supplement: toxins-08-00169-s001.pdf [file toxins-08-00169-s001.pdf]

# Supplementary Materials: Sequence Variability in Staphylococcal Enterotoxin Genes *seb*, *sec*, and *sed*

Sophia Johler, Henna-Maria Sihto, Guerrino Macori and Roger Stephan

## SEB PROMOTER

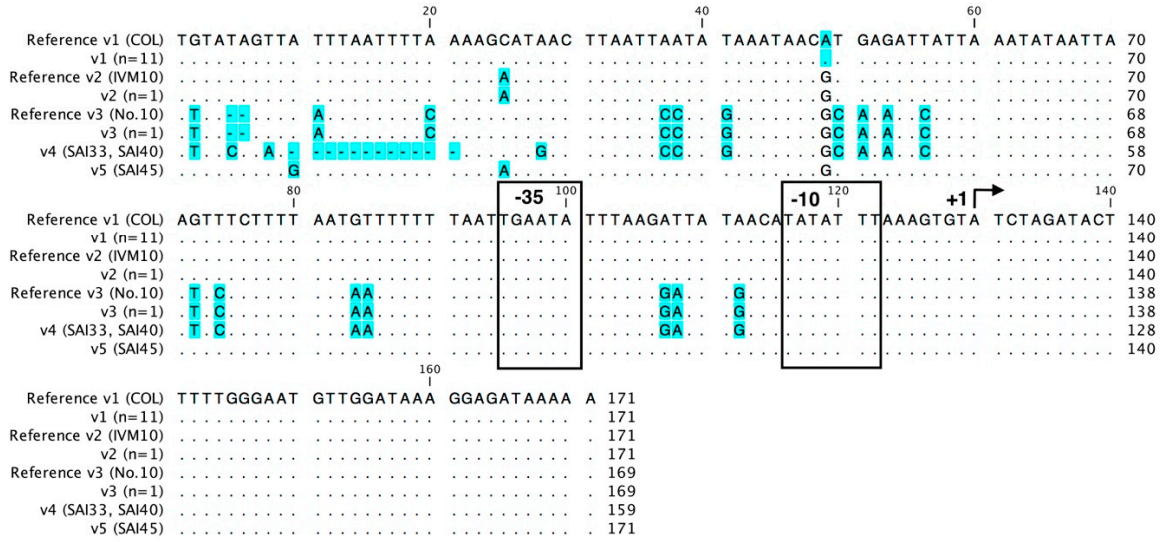

## SEB GENE

|                       |            |             |             |            |            |             |             |     |
|-----------------------|------------|-------------|-------------|------------|------------|-------------|-------------|-----|
|                       |            |             | 20          |            | 40         |             | 60          |     |
| Reference v1 (COL)    | ATGTATAAGA | GATTATTTAT  | TTCACATGTA  | ATTTTGATAT | TCGCACTGAT | ATTAGTTATT  | TCTACACCCA  | 70  |
| v1 (n=5)              | .          | .           | .           | .          | .          | .           | .           | 70  |
| Reference v2 (IVM10)  | .          | .           | .           | .          | T          | .           | .           | 70  |
| v2 (n=1)              | .          | .           | .           | .          | T          | .           | .           | 70  |
| Reference v3 (No. 10) | T          | G           | G           | G          | .          | C           | A           | 70  |
| v3 (n=1)              | T          | G           | G           | G          | .          | C           | A           | 70  |
| Reference v4 (93b_S9) | .          | .           | .           | .          | T          | .           | .           | 70  |
| v4 (n=1)              | .          | .           | .           | .          | T          | .           | .           | 70  |
| v5 (RKI4, SAI33)      | T          | G           | G           | G          | .          | C           | A           | 70  |
|                       |            | 80          |             | 100        |            | 120         |             | 140 |
| Reference v1 (COL)    | ACGTTTTAGC | AGAGAGTCAA  | CCAGATCCTA  | AACCAGATGA | GTTGCACAAA | TCGAGTAAAT  | TCACTGGTTT  | 140 |
| v1 (n=5)              | .          | .           | .           | .          | .          | T           | .           | 140 |
| Reference v2 (IVM10)  | .          | .           | .           | .          | .          | G           | .           | 140 |
| v2 (n=1)              | .          | .           | .           | .          | .          | G           | .           | 140 |
| Reference v3 (No. 10) | .          | A           | C           | .          | .          | G           | .           | 140 |
| v3 (n=1)              | .          | A           | C           | .          | .          | G           | .           | 140 |
| Reference v4 (93b_S9) | .          | .           | .           | .          | .          | G           | .           | 140 |
| v4 (n=1)              | .          | .           | .           | .          | .          | G           | .           | 140 |
| v5 (RKI4, SAI33)      | .          | A           | C           | .          | .          | G           | .           | 140 |
|                       |            | 160         |             | 180        |            | 200         |             | 210 |
| Reference v1 (COL)    | GATGGAAAAT | ATGAAAGTTT  | TGTATGATGA  | TAATCATGTA | TCAGCAATAA | ACGTTAAATC  | TATAGATCAA  | 210 |
| v1 (n=5)              | .          | .           | .           | .          | .          | .           | .           | 210 |
| Reference v2 (IVM10)  | .          | .           | .           | .          | .          | .           | .           | 210 |
| v2 (n=1)              | .          | .           | .           | .          | .          | .           | .           | 210 |
| Reference v3 (No. 10) | .          | .           | A           | C          | .          | .           | .           | 210 |
| v3 (n=1)              | .          | .           | A           | C          | .          | .           | .           | 210 |
| Reference v4 (93b_S9) | .          | .           | .           | .          | .          | .           | .           | 210 |
| v4 (n=1)              | .          | .           | .           | .          | .          | .           | .           | 210 |
| v5 (RKI4, SAI33)      | .          | .           | A           | C          | .          | .           | .           | 210 |
|                       |            | 220         |             | 240        |            | 260         |             | 280 |
| Reference v1 (COL)    | TTTCTATACT | TTGACTTAAT  | ATATTTCTATT | AAGGACACTA | AGTTAGGGAA | TTATGATAAT  | GTTTCGAGTCG | 280 |
| v1 (n=5)              | .          | .           | .           | .          | .          | .           | .           | 280 |
| Reference v2 (IVM10)  | .          | .           | .           | .          | .          | .           | .           | 280 |
| v2 (n=1)              | .          | .           | .           | .          | .          | .           | .           | 280 |
| Reference v3 (No. 10) | .          | .           | .           | .          | .          | .           | .           | 280 |
| v3 (n=1)              | .          | .           | .           | .          | .          | .           | .           | 280 |
| Reference v4 (93b_S9) | .          | .           | .           | .          | .          | .           | .           | 280 |
| v4 (n=1)              | .          | .           | .           | .          | .          | .           | .           | 280 |
| v5 (RKI4, SAI33)      | .          | .           | .           | .          | .          | .           | .           | 280 |
|                       |            | 300         |             | 320        |            | 340         |             | 350 |
| Reference v1 (COL)    | AATTTAAAAA | CAAAGATTTA  | GCTGATAAAT  | ACAAAGATAA | ATACGTAGAT | GTGTTTGGAG  | CTAATTATTA  | 350 |
| v1 (n=5)              | .          | .           | .           | .          | .          | .           | .           | 350 |
| Reference v2 (IVM10)  | .          | .           | .           | .          | .          | .           | .           | 350 |
| v2 (n=1)              | .          | .           | .           | .          | .          | .           | .           | 350 |
| Reference v3 (No. 10) | .          | .           | .           | .          | .          | .           | .           | 350 |
| v3 (n=1)              | .          | .           | .           | .          | .          | .           | .           | 350 |
| Reference v4 (93b_S9) | .          | .           | .           | .          | .          | .           | .           | 350 |
| v4 (n=1)              | .          | .           | .           | .          | .          | .           | .           | 350 |
| v5 (RKI4, SAI33)      | .          | .           | .           | .          | .          | .           | .           | 350 |
|                       |            | 360         |             | 380        |            | 400         |             | 420 |
| Reference v1 (COL)    | TTATCAATGT | TATTTTTCTA  | AAAAAACGAA  | TGATATTAAT | TCGCATCAAA | CTGACAAAACG | AAAAACTTGT  | 420 |
| v1 (n=5)              | .          | .           | .           | .          | T          | .           | .           | 420 |
| Reference v2 (IVM10)  | C          | .           | .           | .          | A          | .           | .           | 420 |
| v2 (n=1)              | C          | .           | .           | .          | A          | .           | .           | 420 |
| Reference v3 (No. 10) | .          | .           | .           | .          | A          | .           | T           | 420 |
| v3 (n=1)              | .          | .           | .           | .          | A          | .           | T           | 420 |
| Reference v4 (93b_S9) | C          | .           | .           | .          | A          | .           | .           | 420 |
| v4 (n=1)              | C          | .           | .           | .          | A          | .           | .           | 420 |
| v5 (RKI4, SAI33)      | C          | .           | .           | .          | A          | .           | .           | 420 |
|                       |            | 440         |             | 460        |            | 480         |             | 490 |
| Reference v1 (COL)    | ATGTATGGTG | GTGTAAC TGA | GCATAATGGA  | AACCAATTAG | ATAAATATAG | AAGTATTACT  | GTTGGGTAT   | 490 |
| v1 (n=5)              | .          | .           | .           | .          | .          | .           | T           | 490 |
| Reference v2 (IVM10)  | .          | .           | .           | .          | .          | .           | T           | 490 |
| v2 (n=1)              | .          | .           | .           | .          | .          | .           | T           | 490 |
| Reference v3 (No. 10) | .          | .           | .           | T          | .          | .           | A           | 490 |
| v3 (n=1)              | .          | .           | .           | T          | .          | .           | A           | 490 |
| Reference v4 (93b_S9) | .          | .           | .           | .          | .          | .           | A           | 490 |
| v4 (n=1)              | .          | .           | .           | .          | .          | .           | A           | 490 |
| v5 (RKI4, SAI33)      | .          | .           | .           | T          | .          | .           | A           | 490 |
|                       |            | 500         |             | 520        |            | 540         |             | 560 |
| Reference v1 (COL)    | TTGAAGATGG | TAAAAATTTA  | TTATCTTTTG  | ACGTACAAAC | TAATAAGAAA | AAGGTGACTG  | CTCAAGAATT  | 560 |
| v1 (n=5)              | .          | .           | .           | .          | .          | T           | .           | 560 |
| Reference v2 (IVM10)  | .          | .           | .           | .          | .          | A           | .           | 560 |
| v2 (n=1)              | .          | .           | .           | .          | .          | A           | .           | 560 |
| Reference v3 (No. 10) | .          | .           | G           | .          | .          | A           | .           | 560 |
| v3 (n=1)              | .          | .           | G           | .          | .          | A           | .           | 560 |
| Reference v4 (93b_S9) | .          | .           | .           | .          | .          | A           | .           | 560 |
| v4 (n=1)              | .          | .           | .           | .          | .          | A           | .           | 560 |
| v5 (RKI4, SAI33)      | .          | .           | G           | .          | .          | A           | .           | 560 |

|                       |            |            |            |            |            |            |            |     |  |
|-----------------------|------------|------------|------------|------------|------------|------------|------------|-----|--|
|                       |            |            | 580        |            | 600        |            | 620        |     |  |
| Reference v1 (COL)    | AGATTACCTA | ACTCGTCACT | ATTTGGTGAA | AAATAAAAAA | CTCTATGAAT | TTAACAACTC | GCCTTATGAA | 630 |  |
| v1 (n=5)              | .....      | .....      | .....      | .....      | .....      | .....      | .....      | 630 |  |
| Reference v2 (IVM10)  | .....      | .....      | .....      | .....      | .....      | .....      | .....      | 630 |  |
| v2 (n=1)              | .....      | .....      | .....      | .....      | .....      | .....      | .....      | 630 |  |
| Reference v3 (No. 10) | .....      | .....      | .....      | .....      | .....      | .....      | A          | 630 |  |
| v3 (n=1)              | .....      | .....      | .....      | .....      | .....      | .....      | A          | 630 |  |
| Reference v4 (93b_S9) | .....      | .....      | .....      | .....      | .....      | .....      | .....      | 630 |  |
| v4 (n=1)              | .....      | .....      | .....      | .....      | .....      | .....      | .....      | 630 |  |
| v5 (RKI4, SAI33)      | .....      | .....      | .....      | .....      | .....      | .....      | A          | 630 |  |
|                       |            | 640        |            | 660        |            | 680        |            | 700 |  |
| Reference v1 (COL)    | ACGGGATATA | TAAATTTAT  | AGAAAATGAG | AATAGCTTTT | GGTATGACAT | GATGCCTGCA | CCAGGAGATA | 700 |  |
| v1 (n=5)              | .....      | .....      | G          | .....      | .....      | .....      | .....      | 700 |  |
| Reference v2 (IVM10)  | .....      | .....      | G          | .....      | .....      | .....      | .....      | 700 |  |
| v2 (n=1)              | .....      | .....      | G          | .....      | .....      | .....      | .....      | 700 |  |
| Reference v3 (No. 10) | .....      | .....      | G          | .....      | .....      | .....      | .....      | 700 |  |
| v3 (n=1)              | .....      | .....      | G          | .....      | .....      | .....      | .....      | 700 |  |
| Reference v4 (93b_S9) | .....      | .....      | G          | .....      | .....      | .....      | .....      | 700 |  |
| v4 (n=1)              | .....      | .....      | G          | .....      | .....      | .....      | .....      | 700 |  |
| v5 (RKI4, SAI33)      | .....      | .....      | G          | .....      | .....      | .....      | .....      | 700 |  |
|                       |            | 720        |            | 740        |            | 760        |            |     |  |
| Reference v1 (COL)    | AATTTGACCA | ATCTAAATAT | TAAATGATGT | ACAATGACAA | TAAATGGTT  | GATTCTAAAG | ATGTGAAGAT | 770 |  |
| v1 (n=5)              | .....      | .....      | .....      | C          | T          | .....      | .....      | 770 |  |
| Reference v2 (IVM10)  | .....      | .....      | .....      | T          | T          | .....      | .....      | 770 |  |
| v2 (n=1)              | .....      | .....      | .....      | T          | T          | .....      | .....      | 770 |  |
| Reference v3 (No. 10) | .....      | .....      | .....      | T          | T          | .....      | .....      | 770 |  |
| v3 (n=1)              | .....      | .....      | .....      | T          | T          | .....      | .....      | 770 |  |
| Reference v4 (93b_S9) | .....      | .....      | .....      | T          | T          | .....      | .....      | 770 |  |
| v4 (n=1)              | .....      | .....      | .....      | T          | T          | .....      | .....      | 770 |  |
| v5 (RKI4, SAI33)      | .....      | .....      | .....      | T          | T          | .....      | .....      | 770 |  |
|                       |            | 780        |            | 800        |            |            |            |     |  |
| Reference v1 (COL)    | TGAAGTTTAT | CTTACGACAA | AGAAAAAGTG | A          | 801        |            |            |     |  |
| v1 (n=5)              | .....      | .....      | .....      | .....      | 801        |            |            |     |  |
| Reference v2 (IVM10)  | .....      | .....      | .....      | .....      | 801        |            |            |     |  |
| v2 (n=1)              | .....      | .....      | .....      | .....      | 801        |            |            |     |  |
| Reference v3 (No. 10) | .....      | .....      | .....      | .....      | 801        |            |            |     |  |
| v3 (n=1)              | .....      | .....      | .....      | .....      | 801        |            |            |     |  |
| Reference v4 (93b_S9) | .....      | .....      | .....      | .....      | 801        |            |            |     |  |
| v4 (n=1)              | .....      | .....      | .....      | .....      | 801        |            |            |     |  |
| v5 (RKI4, SAI33)      | .....      | .....      | .....      | .....      | 801        |            |            |     |  |

### SEB AMINO ACID

|                       |             |            |            |             |            |            |            |     |  |
|-----------------------|-------------|------------|------------|-------------|------------|------------|------------|-----|--|
|                       |             |            | 20         |             | 40         |            | 60         |     |  |
| Reference v1 (COL)    | MYKRLFI SHV | ILIFALILVI | STPNVLAESQ | PDPKPDDELHK | SSKFTGLMEN | MKVLYDDNHV | SAINVKSIDQ | 70  |  |
| v1 (n=5)              | .....       | .....      | .....      | .....       | S          | .....      | .....      | 70  |  |
| Reference v2 (IVM10)  | .....       | V          | .....      | .....       | A          | .....      | .....      | 70  |  |
| v2 (n=2)              | .....       | V          | .....      | .....       | A          | .....      | .....      | 70  |  |
| Reference v3 (No. 10) | N           | V          | R          | .....       | A          | .....      | .....      | 70  |  |
| v3 (n=3)              | N           | V          | R          | .....       | A          | .....      | .....      | 70  |  |
|                       |             | 80         |            | 100         |            | 120        |            | 140 |  |
| Reference v1 (COL)    | FLYFDLIYSI  | KDTKLGNYDN | VRVEFKNKDL | ADKYKDKYVD  | VFGANYYYQC | YFSKKTNDIN | SHQTDKRKTC | 140 |  |
| v1 (n=5)              | .....       | .....      | .....      | .....       | .....      | .....      | .....      | 140 |  |
| Reference v2 (IVM10)  | .....       | .....      | .....      | .....       | .....      | .....      | .....      | 140 |  |
| v2 (n=2)              | .....       | .....      | .....      | .....       | .....      | .....      | .....      | 140 |  |
| Reference v3 (No. 10) | .....       | .....      | .....      | .....       | .....      | .....      | .....      | 140 |  |
| v3 (n=3)              | .....       | .....      | .....      | .....       | .....      | .....      | .....      | 140 |  |
|                       |             | 160        |            | 180         |            | 200        |            |     |  |
| Reference v1 (COL)    | MYGGVTEHNG  | NQLDKYRSIT | VRVFEDGKNL | LSFDVQTNKK  | KVTAQELDYL | TRHYLVKNKK | LYEFNNSPYE | 210 |  |
| v1 (n=5)              | .....       | .....      | .....      | .....       | .....      | .....      | .....      | 210 |  |
| Reference v2 (IVM10)  | .....       | .....      | .....      | .....       | .....      | .....      | .....      | 210 |  |
| v2 (n=2)              | .....       | .....      | .....      | .....       | .....      | .....      | .....      | 210 |  |
| Reference v3 (No. 10) | .....       | H          | .....      | .....       | .....      | .....      | .....      | 210 |  |
| v3 (n=3)              | .....       | H          | .....      | .....       | .....      | .....      | .....      | 210 |  |
|                       |             | 220        |            | 240         |            | 260        |            |     |  |
| Reference v1 (COL)    | TGYIKFIENE  | NSFWYDMMPA | PGDKFDQSKY | LMMYNDNKMV  | DSKDVKIEVY | LTTKKK     | 267        |     |  |
| v1 (n=5)              | .....       | .....      | .....      | .....       | .....      | .....      | 267        |     |  |
| Reference v2 (IVM10)  | .....       | .....      | .....      | .....       | .....      | .....      | 267        |     |  |
| v2 (n=2)              | .....       | .....      | .....      | .....       | .....      | .....      | 267        |     |  |
| Reference v3 (No. 10) | .....       | .....      | .....      | .....       | .....      | .....      | 267        |     |  |
| v3 (n=3)              | .....       | .....      | .....      | .....       | .....      | .....      | 267        |     |  |

Figure S1. Sequence alignments for *seb*.







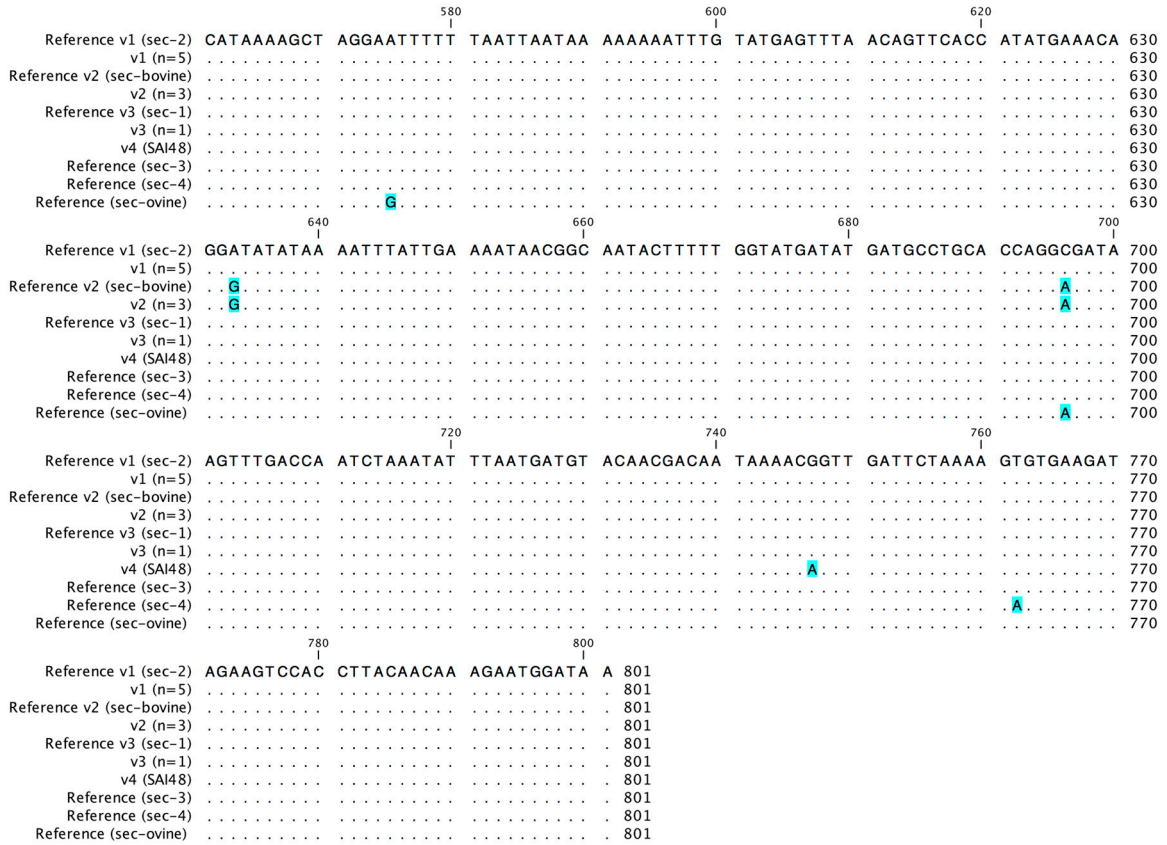

**SEC AMINO ACID**

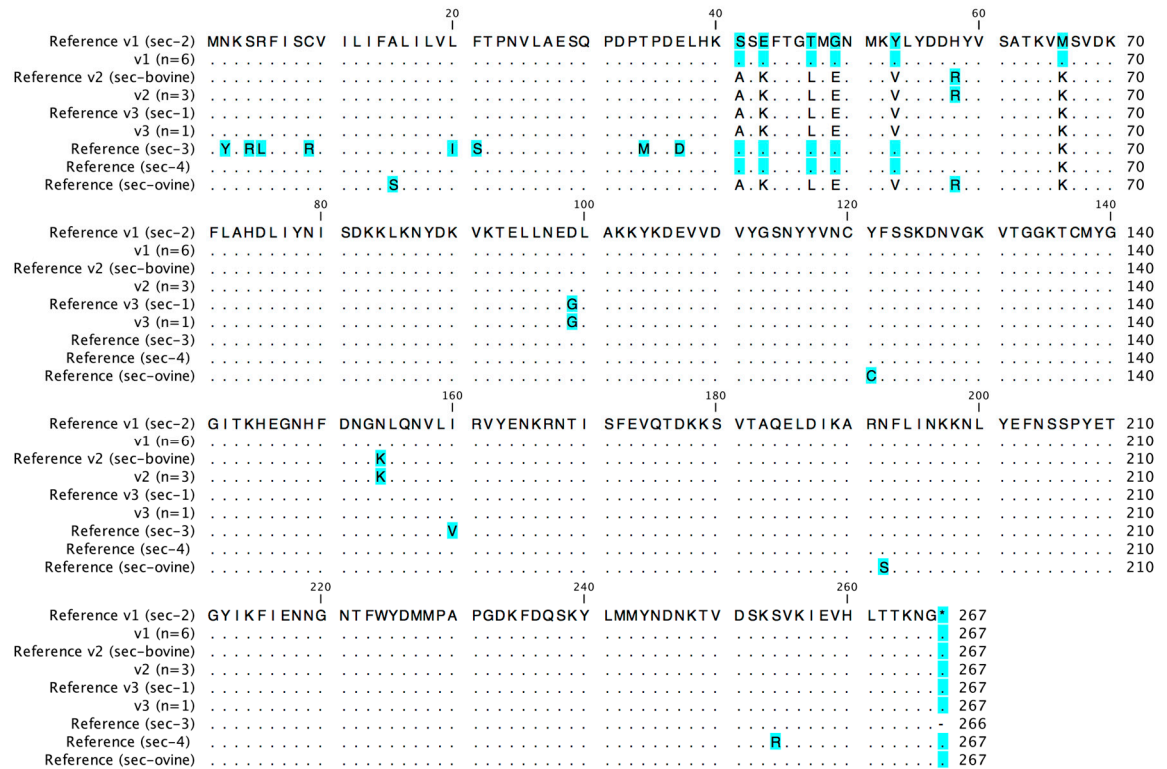

Figure S2. Sequence alignments for sec.

## SED PROMOTER

|                         |            |            |            |            |            |             |            |     |  |
|-------------------------|------------|------------|------------|------------|------------|-------------|------------|-----|--|
|                         |            |            | 20         |            | 40         |             | 60         |     |  |
| Reference v1 (pSAP074A) | ATAAAGTATA | TTTAAAATTT | TATTAATGAT | GGTTTCTTCG | ATAAAATGTT | TTAATTATTA  | AGAGAGACTT | 70  |  |
| v1 (n=8)                | .....      | .....      | .....      | .....      | .....      | .....       | .....      | 70  |  |
| Reference v2 (pSK67)    | T.....     | .....      | .....      | .....      | .....      | .....       | .....      | 70  |  |
| v2 (n=3)                | T.....     | .....      | .....      | .....      | .....      | .....       | .....      | 70  |  |
| v3 (SAI48)              | .....      | .....      | .....      | .....      | .....      | .....       | .....      | 70  |  |
|                         |            | 80         |            | 100        |            | 120         |            | 140 |  |
| Reference v1 (pSAP074A) | GATCTGTTTA | GACCAAGTCT | CAAATTATTA | AAGATAATAT | TTGTTGGAGT | GTATGAAATG  | GATCAAATAT | 140 |  |
| v1 (n=8)                | .....      | .....      | .....      | .....      | .....      | .....       | .....      | 140 |  |
| Reference v2 (pSK67)    | .....      | .....      | .....      | .....      | .....      | .....       | .....      | 140 |  |
| v2 (n=3)                | .....      | .....      | .....      | .....      | .....      | .....       | .....      | 140 |  |
| v3 (SAI48)              | .....      | .....      | .....      | .....      | .....      | .....       | .....      | 140 |  |
|                         |            |            | 160        |            | 180        |             | 200        |     |  |
| Reference v1 (pSAP074A) | ATTGATATAA | TGAAAGTGAG | CAAGTTGGAT | AGATTGCGGC | TAGTCTCTTG | AAAAAAGGGA  | TTCCTATGTT | 210 |  |
| v1 (n=8)                | .....      | .....      | .....      | .....      | .....      | .....       | .....      | 210 |  |
| Reference v2 (pSK67)    | .....      | .....      | .....      | .....      | .....      | .....       | .....      | 210 |  |
| v2 (n=3)                | .....      | .....      | .....      | .....      | .....      | .....       | .....      | 210 |  |
| v3 (SAI48)              | .....      | .....      | .....      | .....      | .....      | .....       | .....      | 210 |  |
|                         |            | 220        |            | 240        |            | 260         |            | 280 |  |
| Reference v1 (pSAP074A) | TATAGTTGGT | ACTTCTAGGA | AGGACTAGCA | TGCTTATTT  | CGAAATGCTG | ATGGTTGTAT  | TAACAATTAT | 280 |  |
| v1 (n=8)                | .....      | .....      | .....      | .....      | .....      | .....       | .....      | 280 |  |
| Reference v2 (pSK67)    | .....      | .....      | .....      | .....      | .....      | .....       | .....      | 280 |  |
| v2 (n=3)                | .....      | .....      | .....      | .....      | .....      | .....       | .....      | 280 |  |
| v3 (SAI48)              | .....      | .....      | .....      | .....      | .....      | .....       | .....      | 280 |  |
|                         |            |            | 300        |            | 320        |             | 340        |     |  |
| Reference v1 (pSAP074A) | GAGTTTAGTC | TTAATTAGTA | ATCAAAACTC | TGAATGTATT | GTCTACATAA | TCGGTGTAAAC | AATAATATAT | 350 |  |
| v1 (n=8)                | .....      | .....      | .....      | .....      | .....      | .....       | .....      | 350 |  |
| Reference v2 (pSK67)    | .....      | .....      | .....      | .....      | .....      | .....       | .....      | 350 |  |
| v2 (n=3)                | .....      | .....      | .....      | .....      | .....      | .....       | .....      | 350 |  |
| v3 (SAI48)              | .....      | .....      | .....      | .....      | .....      | .....       | .....      | 350 |  |
|                         |            | 360        |            | 380        |            | 400         |            | 420 |  |
| Reference v1 (pSAP074A) | ATCCGAAAGA | TAAAGTACT  | CTATAAAAGA | ATCATTTAAA | GGTGCTCAAA | TTTATTGAAA  | AAAGGTGGAA | 420 |  |
| v1 (n=8)                | .....      | .....      | .....      | .....      | .....      | .....       | .....      | 420 |  |
| Reference v2 (pSK67)    | .....      | .....      | .....      | .....      | .....      | .....       | .....      | 420 |  |
| v2 (n=3)                | .....      | .....      | .....      | .....      | .....      | .....       | .....      | 420 |  |
| v3 (SAI48)              | .....      | .....      | .....      | .....      | .....      | .....       | .....      | 420 |  |
| Reference v1 (pSAP074A) | T          | 421        |            |            |            |             |            |     |  |
| v1 (n=8)                | .          | 421        |            |            |            |             |            |     |  |
| Reference v2 (pSK67)    | .          | 421        |            |            |            |             |            |     |  |
| v2 (n=3)                | .          | 421        |            |            |            |             |            |     |  |
| v3 (SAI48)              | .          | 421        |            |            |            |             |            |     |  |



## SED GENE

|                         |             |            |            |            |            |             |                |
|-------------------------|-------------|------------|------------|------------|------------|-------------|----------------|
|                         |             | 20         |            | 40         |            | 60          |                |
| Reference v1 (pSAP074A) | ATGAAAAAAT  | TAAACATTCT | TATTGCATTA | CTCTTTTTTA | CTAGTTTGGT | AATATCTCCT  | TAAACGTTA 70   |
| v1 (n=4)                | .....       | .....      | .....      | .....      | .....      | .....       | 70             |
| Reference v2 (pSK67)    | .....       | .....      | .....      | .....      | .....      | .....       | 70             |
| v2 (n=4)                | .....       | .....      | .....      | .....      | .....      | .....       | 70             |
| Reference v3 (P502A)    | .....       | .....      | .....      | .....      | .....      | .....       | 70             |
| v3 (n=6)                | .....       | .....      | .....      | .....      | .....      | .....       | 70             |
| v4 (SANC30)             | .....       | .....      | .....      | .....      | .....      | .....       | 70             |
| Reference (pIB485)      | .....       | .....      | .....      | .....      | .....      | .....       | 70             |
|                         |             | 80         |            | 100        |            | 120         |                |
| Reference v1 (pSAP074A) | AAGCCAATGA  | AAACATTGAT | TCAGTAAAAG | AGAAAGAATT | GCATAAAAAA | TCTGAATTAA  | GTAGTACCGC 140 |
| v1 (n=4)                | .....       | .....      | .....      | .....      | .....      | .....       | 140            |
| Reference v2 (pSK67)    | .....       | .....      | .....      | .....      | .....      | .....       | 140            |
| v2 (n=4)                | .....       | .....      | .....      | .....      | .....      | .....       | 140            |
| Reference v3 (P502A)    | .....       | .....      | .....      | .....      | .....      | .....       | 140            |
| v3 (n=6)                | .....       | .....      | .....      | .....      | .....      | .....       | 140            |
| v4 (SANC30)             | .....       | .....      | .....      | .....      | .....      | .....       | 140            |
| Reference (pIB485)      | .....       | .....      | .....      | .....      | .....      | .....       | 140            |
|                         |             | 160        |            | 180        |            | 200         |                |
| Reference v1 (pSAP074A) | GCTAAATAAT  | ATGAAACATT | CTTATGCAGA | TAAAAATCCA | ATAATAGGAG | AAAATAAAAAG | TACAGGAGAT 210 |
| v1 (n=4)                | .....       | .....      | .....      | .....      | .....      | .....       | 210            |
| Reference v2 (pSK67)    | .....       | .....      | .....      | .....      | .....      | .....       | 210            |
| v2 (n=4)                | .....       | .....      | .....      | .....      | .....      | .....       | 210            |
| Reference v3 (P502A)    | .....       | .....      | .....      | .....      | .....      | .....       | 210            |
| v3 (n=6)                | .....       | .....      | .....      | .....      | .....      | .....       | 210            |
| v4 (SANC30)             | .....       | .....      | .....      | .....      | .....      | .....       | 210            |
| Reference (pIB485)      | .....       | .....      | .....      | .....      | .....      | .....       | 210            |
|                         |             | 220        |            | 240        |            | 260         |                |
| Reference v1 (pSAP074A) | CAATTTTTAG  | AAAATACTTT | GCTTTACAAA | AAATTTTTTA | CTGACCTTAT | CAATTTTGAA  | GATTTATTAA 280 |
| v1 (n=4)                | .....       | .....      | .....      | .....      | .....      | .....       | 280            |
| Reference v2 (pSK67)    | .....       | .....      | .....      | .....      | .....      | .....       | 280            |
| v2 (n=4)                | .....       | .....      | .....      | .....      | .....      | .....       | 280            |
| Reference v3 (P502A)    | .....       | .....      | .....      | .....      | .....      | .....       | 280            |
| v3 (n=6)                | .....       | .....      | .....      | .....      | .....      | .....       | 280            |
| v4 (SANC30)             | .....       | .....      | .....      | .....      | .....      | .....       | 280            |
| Reference (pIB485)      | .....       | .....      | .....      | .....      | .....      | .....       | 280            |
|                         |             | 300        |            | 320        |            | 340         |                |
| Reference v1 (pSAP074A) | TAAACTTCAA  | TTCAAAAGAA | ATGGCTCAAC | ATTTCAAATC | TAAAAATGTA | GATGTTTACG  | CTATAAGATA 350 |
| v1 (n=4)                | .....       | .....      | .....      | .....      | .....      | .....       | 350            |
| Reference v2 (pSK67)    | .....       | .....      | .....      | .....      | .....      | .....       | 350            |
| v2 (n=4)                | .....       | .....      | .....      | .....      | .....      | .....       | 350            |
| Reference v3 (P502A)    | .....       | .....      | .....      | .....      | .....      | .....       | 350            |
| v3 (n=6)                | .....       | .....      | .....      | .....      | .....      | .....       | 350            |
| v4 (SANC30)             | .....       | .....      | .....      | .....      | .....      | .....       | 350            |
| Reference (pIB485)      | .....       | .....      | .....      | .....      | .....      | .....       | 350            |
|                         |             | 360        |            | 380        |            | 400         |                |
| Reference v1 (pSAP074A) | TAGCATTAAAT | TGTTATGGTG | GTGAAATAGA | TAGGACTGCT | TGTACATATG | GAGGTGTCAC  | TCCACACGAA 420 |
| v1 (n=4)                | .....       | .....      | .....      | .....      | .....      | .....       | 420            |
| Reference v2 (pSK67)    | .....       | .....      | .....      | .....      | .....      | .....       | 420            |
| v2 (n=4)                | .....       | .....      | .....      | .....      | .....      | .....       | 420            |
| Reference v3 (P502A)    | .....       | .....      | .....      | .....      | .....      | .....       | 420            |
| v3 (n=6)                | .....       | .....      | .....      | .....      | .....      | .....       | 420            |
| v4 (SANC30)             | .....       | .....      | .....      | .....      | .....      | .....       | 420            |
| Reference (pIB485)      | .....       | .....      | .....      | .....      | .....      | .....       | 420            |
|                         |             | 440        |            | 460        |            | 480         |                |
| Reference v1 (pSAP074A) | GGTAATAAAT  | TAAAAGAACG | AAAAAAAATA | CCAATCAATT | TGTGGATAAA | TGGTGTAACA  | AAAGAAGTTT 490 |
| v1 (n=4)                | .....       | .....      | .....      | .....      | .....      | .....       | 490            |
| Reference v2 (pSK67)    | .....       | .....      | .....      | .....      | .....      | .....       | 490            |
| v2 (n=4)                | .....       | .....      | .....      | .....      | .....      | .....       | 490            |
| Reference v3 (P502A)    | .....       | .....      | .....      | .....      | .....      | .....       | 490            |
| v3 (n=6)                | .....       | .....      | .....      | .....      | .....      | .....       | 490            |
| v4 (SANC30)             | .....       | .....      | .....      | .....      | .....      | .....       | 490            |
| Reference (pIB485)      | .....       | .....      | .....      | .....      | .....      | .....       | 490            |
|                         |             | 500        |            | 520        |            | 540         |                |
| Reference v1 (pSAP074A) | CTTTAGATAA  | AGTTCAAACA | GATAAAAAAA | ATGTTACCGT | ACAAGAATTA | GATGCACAAG  | CAAGGCGCTA 560 |
| v1 (n=4)                | .....       | .....      | .....      | .....      | .....      | .....       | 560            |
| Reference v2 (pSK67)    | .....       | .....      | .....      | .....      | .....      | .....       | 560            |
| v2 (n=4)                | .....       | .....      | .....      | .....      | .....      | .....       | 560            |
| Reference v3 (P502A)    | .....       | .....      | .....      | .....      | .....      | .....       | 560            |
| v3 (n=6)                | .....       | .....      | .....      | .....      | .....      | .....       | 559            |
| v4 (SANC30)             | .....       | .....      | .....      | .....      | .....      | .....       | 559            |
| Reference (pIB485)      | .....       | .....      | .....      | .....      | .....      | .....       | 560            |
|                         |             |            |            |            |            |             | 560            |



|                         |            |            |            |            |            |            |                |
|-------------------------|------------|------------|------------|------------|------------|------------|----------------|
|                         |            | 580        |            | 600        |            | 620        |                |
| Reference v1 (pSAP074A) | TTTGCAAAG  | GATTTAAAT  | TGTATAATA  | TGATACTCT  | GGAGGAAAA  | TACAGCGCG  | AAAAATAGAG 630 |
| v1 (n=4)                | .....      | .....      | .....      | .....      | .....      | .....      | 630            |
| Reference v2 (pSK67)    | .....      | .....      | .....      | .....      | .....      | .....      | 630            |
| v2 (n=4)                | .....      | .....      | .....      | .....      | .....      | .....      | 630            |
| Reference v3 (P502A)    | .....      | .....      | .....      | .....      | .....      | .....      | 629            |
| v3 (n=6)                | .....      | .....      | .....      | .....      | .....      | .....      | 629            |
| v4 (SANC30)             | .....      | .....      | .....      | .....      | .....      | .....      | 630            |
| Reference (piB485)      | .....      | .....      | .....      | .....      | .....      | .....      | 630            |
|                         | 640        |            | 660        |            | 680        |            | 700            |
| Reference v1 (pSAP074A) | TTTGATTCTT | CTGATGGGTC | TAAAGTCTCT | TATGATTAT  | TTGATGTTAA | GGGTGATTTT | CCCGAAAAAC 700 |
| v1 (n=4)                | .....      | .....      | .....      | .....      | .....      | .....      | 700            |
| Reference v2 (pSK67)    | .....      | .....      | .....      | .....      | .....      | .....      | 700            |
| v2 (n=4)                | .....      | .....      | .....      | .....      | .....      | .....      | 700            |
| Reference v3 (P502A)    | .....      | .....      | .....      | .....      | .....      | .....      | 699            |
| v3 (n=6)                | .....      | .....      | .....      | .....      | .....      | .....      | 699            |
| v4 (SANC30)             | .....      | .....      | .....      | .....      | .....      | .....      | 700            |
| Reference (piB485)      | .....      | .....      | .....      | .....      | .....      | .....      | 700            |
|                         |            | 720        |            | 740        |            | 760        |                |
| Reference v1 (pSAP074A) | AATTACGAAT | ATACAGTGAT | AATAAAACAT | TATCCACAGA | GCACCTTCAT | ATTGACATCT | ATTTATATGA 770 |
| v1 (n=4)                | .....      | .....      | .....      | .....      | .....      | .....      | 770            |
| Reference v2 (pSK67)    | .....      | .....      | .....      | .....      | .....      | .....      | 770            |
| v2 (n=4)                | .....      | .....      | .....      | .....      | .....      | .....      | 770            |
| Reference v3 (P502A)    | .....      | .....      | .....      | .....      | .....      | .....      | 769            |
| v3 (n=6)                | .....      | .....      | .....      | .....      | .....      | .....      | 769            |
| v4 (SANC30)             | .....      | .....      | .....      | .....      | .....      | .....      | 770            |
| Reference (piB485)      | .....      | .....      | .....      | .....      | .....      | .....      | 770            |
| Reference v1 (pSAP074A) | AAAGTAG    | 777        |            |            |            |            |                |
| v1 (n=4)                | .....      | 777        |            |            |            |            |                |
| Reference v2 (pSK67)    | .....      | 777        |            |            |            |            |                |
| v2 (n=4)                | .....      | 777        |            |            |            |            |                |
| Reference v3 (P502A)    | .....      | 776        |            |            |            |            |                |
| v3 (n=6)                | .....      | 776        |            |            |            |            |                |
| v4 (SANC30)             | .....      | 777        |            |            |            |            |                |
| Reference (piB485)      | .....      | 777        |            |            |            |            |                |

### SED AMINO ACID

|                         |              |             |            |               |              |            |                 |
|-------------------------|--------------|-------------|------------|---------------|--------------|------------|-----------------|
|                         |              | 20          |            | 40            |              | 60         |                 |
| Reference v1 (pSAP074A) | MKKFNILIAL   | LFFTSLVISP  | LNVKANENID | SVKEKELHKK    | SELSSTALNN   | MKHSYADKNP | IIGENKSTGD 70   |
| v1 (n=4)                | .....        | .....       | .....      | .....         | .....        | .....      | 70              |
| Reference v2 (pSK67)    | .....        | .....       | .....      | .....         | .....        | .....      | 70              |
| v2 (n=4)                | .....        | .....       | .....      | .....         | .....        | .....      | 70              |
| Reference v3 (p502A)    | .....        | .....       | .....      | .....         | .....        | .....      | 70              |
| v3 (n=6)                | .....        | .....       | .....      | .....         | .....        | .....      | 70              |
| v4 (SANC30)             | .....        | .....       | .....      | .....         | .....        | .....      | 70              |
| Reference (piB485)      | .....        | .....       | .....      | .....         | .....        | .....      | 70              |
|                         | 80           |             | 100        |               | 120          |            | 140             |
| Reference v1 (pSAP074A) | QFLENTLLYK   | KFFFTDLINFE | DLLINFNSKE | MAQHFKSKNV    | DVYAIRYSIN   | CYGGIEDRTA | CTYGGVTPHE 140  |
| v1 (n=4)                | .....        | .....       | .....      | .....         | .....        | .....      | 140             |
| Reference v2 (pSK67)    | .....        | .....       | .....      | .....         | .....        | .....      | 140             |
| v2 (n=4)                | .....        | .....       | .....      | .....         | .....        | .....      | 140             |
| Reference v3 (p502A)    | .....        | .....       | .....      | .....         | .....        | .....      | 140             |
| v3 (n=6)                | .....        | .....       | .....      | .....         | .....        | .....      | 140             |
| v4 (SANC30)             | .....        | .....       | .....      | .....         | .....        | .....      | 140             |
| Reference (piB485)      | .....        | .....       | .....      | .....         | .....        | .....      | 140             |
|                         |              | 160         |            | 180           |              | 200        |                 |
| Reference v1 (pSAP074A) | GNK LKERKK I | PINLWINGVQ  | KEVSLDKVQT | DKKNV - - - T | VQELDAQARR   | YLQKDLKLYN | NDTLGGK IQR 206 |
| v1 (n=4)                | .....        | .....       | .....      | .....         | .....        | .....      | 206             |
| Reference v2 (pSK67)    | .....        | .....       | .....      | .....         | .....        | .....      | 206             |
| v2 (n=4)                | .....        | .....       | .....      | .....         | .....        | .....      | 206             |
| Reference v3 (p502A)    | .....        | .....       | .....      | .....         | .....        | .....      | 180             |
| v3 (n=6)                | .....        | .....       | .....      | .....         | .....        | .....      | 180             |
| v4 (SANC30)             | .....        | .....       | .....      | .....         | .....        | .....      | 206             |
| Reference (piB485)      | .....        | .....       | .....      | .....         | .....        | .....      | 206             |
|                         | 220          |             | 240        |               | 260          |            |                 |
| Reference v1 (pSAP074A) | GK I EFDSSDG | SKVSYDLFDV  | KGDFPEKQLR | IYSDNKT LST   | EHLHID I YLY | EK         | 259             |
| v1 (n=4)                | .....        | .....       | .....      | .....         | .....        | .....      | 259             |
| Reference v2 (pSK67)    | .....        | .....       | .....      | .....         | .....        | .....      | 259             |
| v2 (n=4)                | .....        | .....       | .....      | .....         | .....        | .....      | 259             |
| Reference v3 (p502A)    | .....        | .....       | .....      | .....         | .....        | .....      | 180             |
| v3 (n=6)                | .....        | .....       | .....      | .....         | .....        | .....      | 180             |
| v4 (SANC30)             | .....        | .....       | .....      | .....         | .....        | .....      | 259             |
| Reference (piB485)      | .....        | .....       | .....      | .....         | .....        | .....      | 259             |

Figure S3. Sequence alignments for *sed*.

**Table S1.** Primers used in this study.

| Target              | Primer ID | Primer Sequence (5'-3')   | Annealing Temperature (°C) |
|---------------------|-----------|---------------------------|----------------------------|
| <i>seb</i> promoter | seb_p_fwd | TGAGGAGATTGAAGCAACGC      | 56                         |
|                     | seb_p_rev | AGGCAGGTACTCTATAAGTGCC    |                            |
| <i>seb</i>          | seb_fwd   | TGATGATAATCATGTATCAGCA    | 61                         |
|                     | seb_rev   | ACGGCGACACAGTAACTATCCA    |                            |
| <i>sec</i> promoter | sec_p_fwd | TCAAGATGCTTAGAAATCCTCTGT  | 66                         |
|                     | sec_p_rev | AGCTTTCTGGAAGACCGTATCCTGT |                            |
| <i>sec</i>          | sec_fwd   | TCAAGATGCTTAGAAATCCTCTGT  | 63                         |
|                     | sec_rev   | TCGGTGCTTGCCTTTTATAGGA    |                            |
| <i>sed</i> promoter | sed_p_fwd | ATCCGGCTGTTCTATGGCACC     | 56                         |
|                     | sed_p_rev | AGATGCACAAGCAAGGCGCT      |                            |
| <i>sed</i>          | sed_fwd   | TTCGAAATGCTGATGGTTGT      | 62                         |
|                     | sed_rev   | AGCTATCATCAATTTCTTTCAAGC  |                            |
